# Supplementary material for: Clinical impacts of severe thrombocytopenia in the first cycle of azacitidine monotherapy and cytogenetics in patients with myelodysplastic syndrome: The Kyoto Conditional Survival Scoring System
Source: PubMed Central journal article supplement — Oncol Lett. 2023 Dec 18;27(2):62. doi: 10.3892/ol.2023.14193 (PMC10773215; doi:10.3892/ol.2023.14193), 2023-12-18
Supplement: Supplementary_Data.pdf [file Supplementary_Data.pdf]

Table SI. Correlation analysis between PC28 and other variables by Spearman's rank correlation coefficient.

| Variable                             | r      | P-value |
|--------------------------------------|--------|---------|
| Age                                  | -0.116 | 0.169   |
| Sex                                  | -0.002 | 0.981   |
| Hemoglobin level                     | -0.258 | 0.002   |
| Platelet counts                      | -0.623 | <0.001  |
| WBC                                  | -0.107 | 0.202   |
| ANC                                  | -0.138 | 0.100   |
| Blast in bone marrow                 | -0.025 | 0.763   |
| Cytogenetic risk according to IPSS-R | 0.101  | 0.231   |
| RCC28                                | 0.583  | <0.001  |
| ANC29                                | -0.281 | <0.001  |
| RDI-AZA1                             | -0.079 | 0.349   |

ANC, absolute neutrophil counts; IPSS-R, Revised International Prognostic Scoring System; PC, platelet concentrate; RCC, red cell concentrates; RDI-AZA1, relative dose intensity in the first cycle of azacitidine treatment; WBC, white blood cells.
